# Supplementary material for: Silver nanoparticles supported on passivated silica: preparation and catalytic performance in alkyne semi-hydrogenation
Source: Royal Society of Chemistry journal article supplement (doi:10.1039/c4dt01320d), 2014-01-01
Supplement: c4dt01320d1.pdf [file c4dt01320d1.pdf]

## Supporting Information

### Silver Nanoparticles Supported on Passivated Silica: Preparation and Catalytic Performance in Alkyne Semi- hydrogenation

Emma Oakton,<sup>a</sup> Gianvito Vilé,<sup>b</sup> Daniel Levine,<sup>c,§</sup> Eva Zocher,<sup>a,c,‡</sup> David Baudouin,<sup>a</sup>  
Javier Pérez-Ramírez<sup>b\*</sup> and Christophe Copéret<sup>a,c\*</sup>

<sup>a</sup> Laboratory of Inorganic Chemistry, Department of Chemistry and Applied Biosciences, ETH Zürich, Vladimir-Prelog Weg 2, Zürich, Switzerland. E-mail: [ccoperet@inorg.chem.ethz.ch](mailto:ccoperet@inorg.chem.ethz.ch)

<sup>b</sup> Institute for Chemical and Bioengineering, Department of Chemistry and Applied Biosciences, ETH Zürich, Vladimir-Prelog Weg 1, Zürich, Switzerland. E-mail: [jpr@chem.ethz.ch](mailto:jpr@chem.ethz.ch)

<sup>c</sup> Université de Lyon, Institut de Chimie de Lyon, UMR C2P2 CNRS-UCBL-ESCPE Lyon, 43 Bd. du 11 Novembre 1918, 69616 Villeurbanne, France.

<sup>§</sup> Department of Chemistry, 419 Latimer Hall, University of California, Berkeley, CA 94720-1460, USA.

<sup>‡</sup> Wacker Chemie AG, Hanns-Seidel Platz 4, 81737 München, Germany.

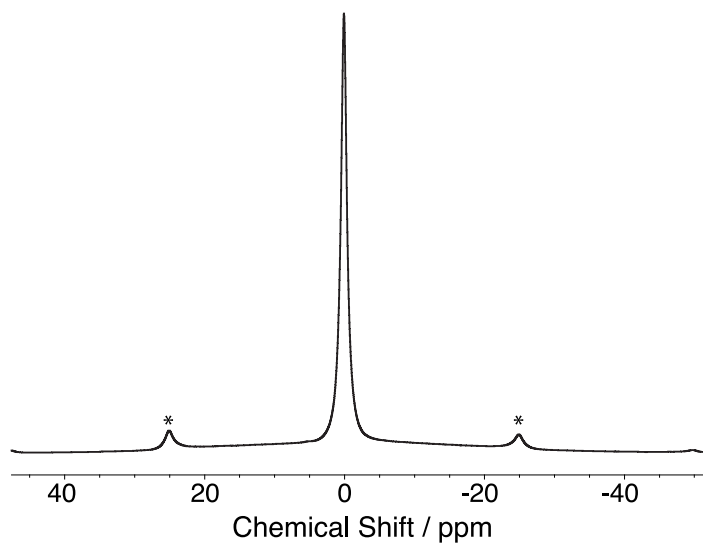

Figure S1:  $^1\text{H}$  MAS NMR of  $\text{Ag(I)}@\text{SiO}_2$  (10 kHz, 400 MHz,  $n_s = 32$ ). Spinning sidebands are denoted by \*

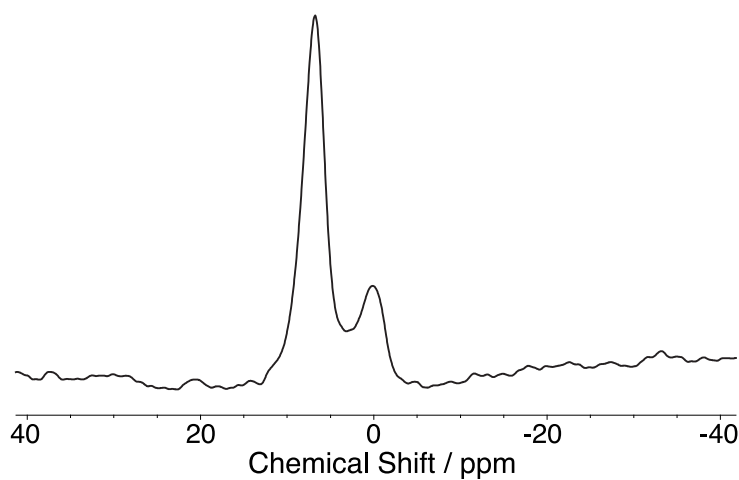

Figure S2:  $^{13}\text{C}$  HPDEC MAS NMR of  $\text{Ag(I)}@\text{SiO}_2$  (10 kHz, 400 MHz,  $n_s = 30720$ )

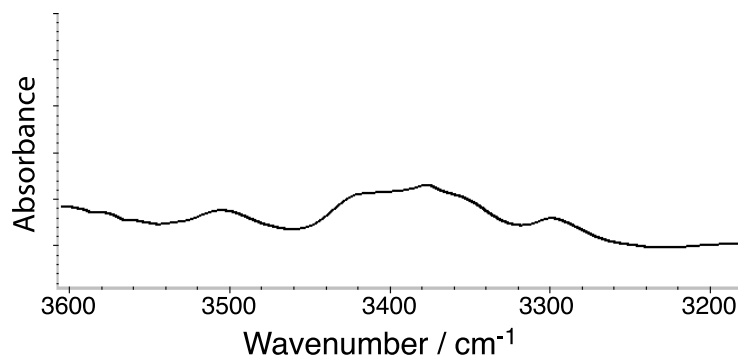

Figure S3: Zoom in of IR spectra of  $\text{Ag}_{\text{NP}}@\text{SiO}_2\text{-TMS}$  showing N-H vibration region

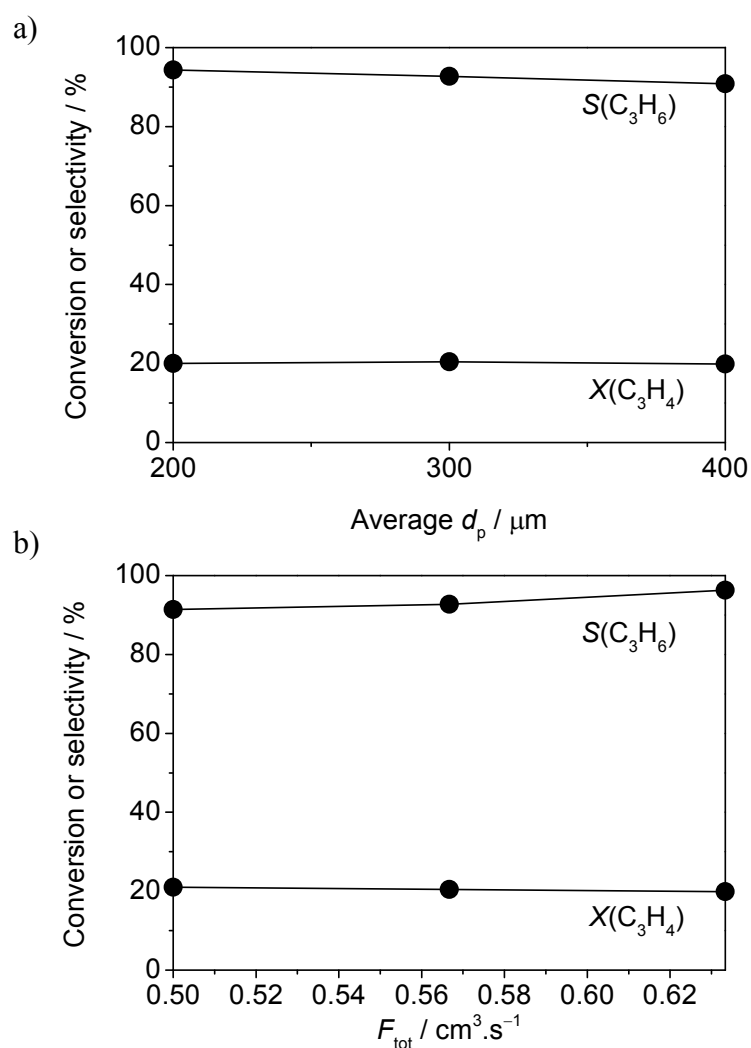

Figure S4: Conversion ( $X$ ) of propyne and selectivity ( $S$ ) towards propene versus a) average particle diameter determined by sieving ( $d_p$ ) and b) total flow ( $F_{\text{tot}}$ ). The influence of the average particle size was studied with 0.2 g of catalyst (sieve fraction = 0.1-0.3 mm, 0.2-0.4 mm, and 0.2-0.6 mm), at  $T = 200$  °C,  $P = 1$  bar,  $\text{H}_2/\text{C}_3\text{H}_4 = 25$ ,  $\tau$  (contact time) = 0.07 s. The influence of the flow rate was studied with variable catalyst mass (sieve fraction = 0.2-0.4 mm), keeping  $\tau = 0.07$  s, at  $T = 200$  °C,  $P = 1$  bar,  $\text{H}_2/\text{C}_3\text{H}_4 = 25$ .

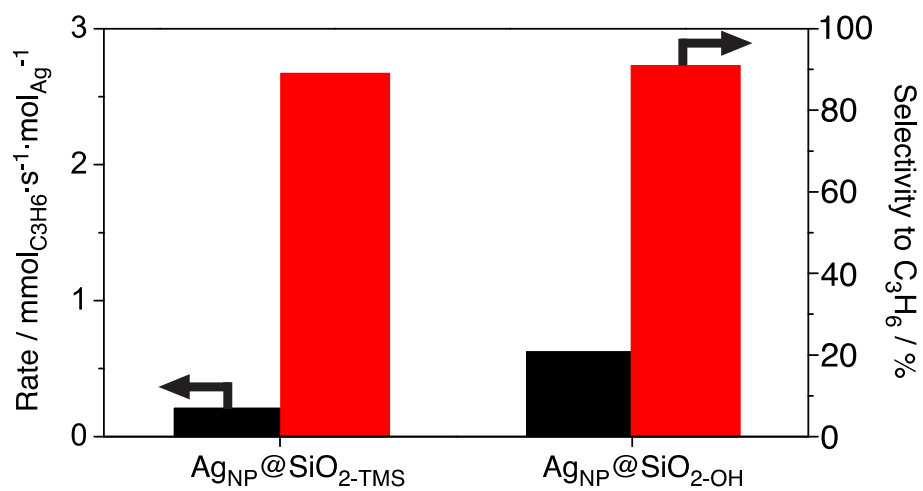

Figure S5: Catalytic activity and selectivity for the semi-hydrogenation of propyne for Ag<sub>NP</sub>@SiO<sub>2</sub>-TMS and Ag<sub>NP</sub>@SiO<sub>2</sub>-OH at 75% propyne conversion

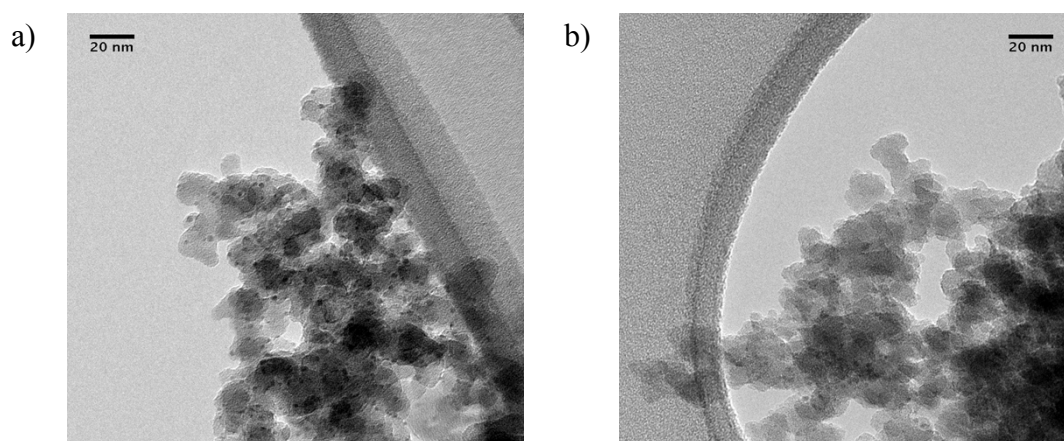

Figure S6: TEM images of a) Ag<sub>NP</sub>@SiO<sub>2</sub>-TMS and b) Ag<sub>NP</sub>@SiO<sub>2</sub>-OH after catalysis

a)

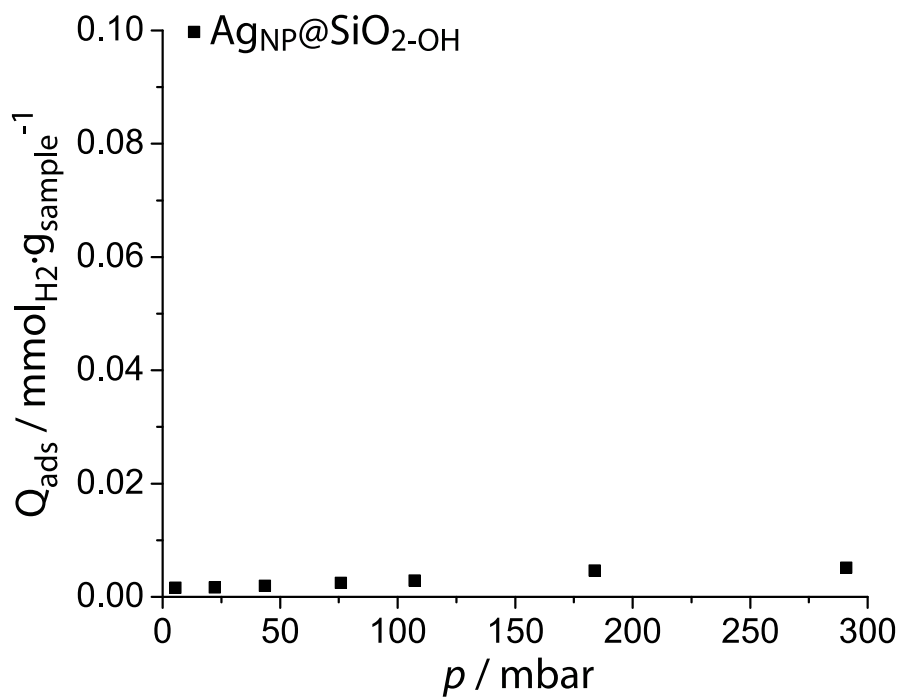

b)

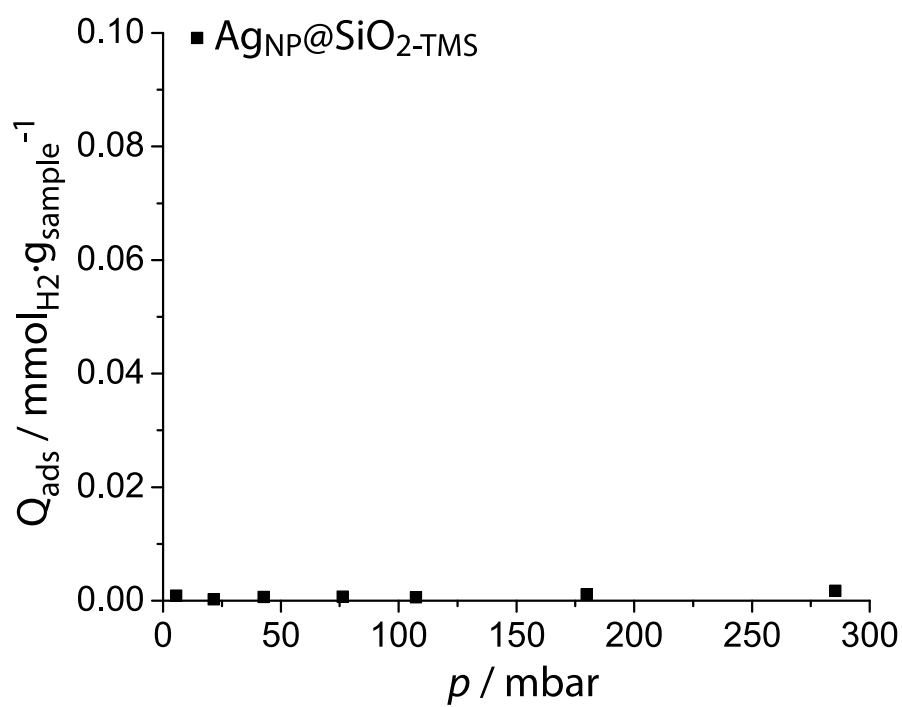

Figure S7: H<sub>2</sub> adsorption isotherms at 0 °C for a) Ag<sub>NP</sub>@SiO<sub>2</sub>-OH and b) Ag<sub>NP</sub>@SiO<sub>2</sub>-TMS

a)

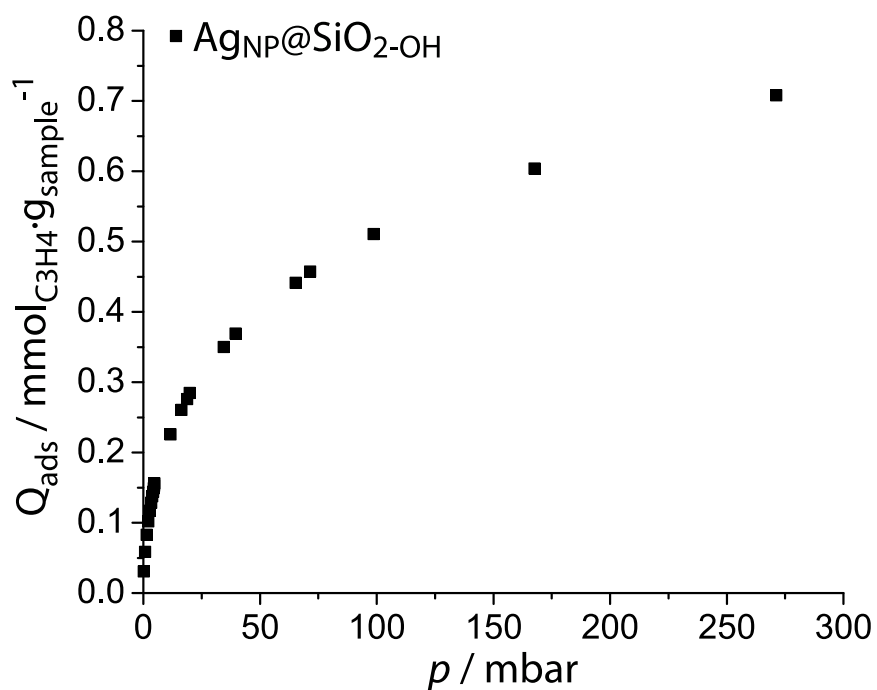

b)

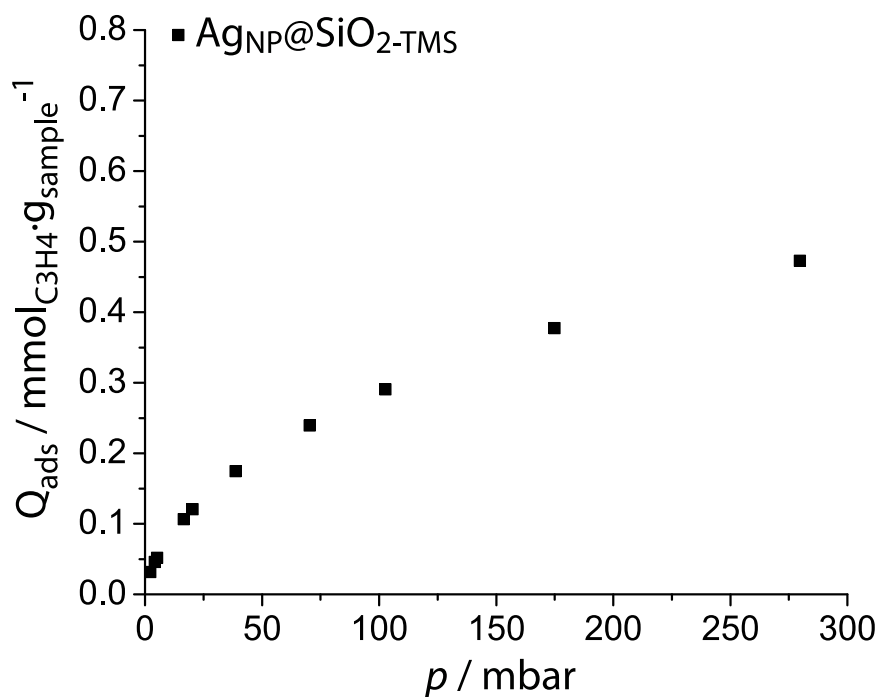

Figure S8: C<sub>3</sub>H<sub>4</sub> adsorption isotherms at 0 °C for a) Ag<sub>NP</sub>@SiO<sub>2</sub>-OH and b) Ag<sub>NP</sub>@SiO<sub>2</sub>-TMS
